# Supplementary material for: Monitoring Lead Concentration in the Surrounding Environmental Components of a Lead Battery Company: Plants, Air and Effluents—Case Study, Kenya
Source: MDPI journal article supplement (doi:10.3390/ijerph19095195), 2022-04-25
Supplement: s1 [file s1]

**Table S1.** The results of measurements of Lead (Pb) concentration in Air in ppm within the Associated Battery Manufacturing (East Africa ).

| Unit operation sections  | Before Sampling     | After Sampling               |                      |                     |                              |                      | Weight of Lead Sampled in grams |                       | Calculations                   |            |                     |
|--------------------------|---------------------|------------------------------|----------------------|---------------------|------------------------------|----------------------|---------------------------------|-----------------------|--------------------------------|------------|---------------------|
|                          | Weight of cartridge | Weight of cartridge & filter | Weight of filter WtB | Weight of cartridge | Weight of cartridge & filter | Weight of filter WtA | (WtA – WtB)                     | Flow rate (Litre/Min) | Volume of air Sampled (Litres) | Lead (ppm) | Lead In Air (mg/m3) |
| MacParter A              | 0.3517              | 0.37231                      | 0.02061              | 0.3517              | 0.37339                      | 0.02169              | 0.00108                         | 1.2                   | 602.5                          | 1.81       | 0.150207            |
| MacParter B              | 0.33664             | 0.35774                      | 0.0211               | 0.33664             | 0.35781                      | 0.02117              | 0.00007                         | 1.2                   | 601.8                          | 1.43       | 0.11881             |
| Super 85 A               | 0.35173             | 0.37222                      | 0.02049              | 0.35173             | 0.3727                       | 0.02093              | 0.00044                         | 1.2                   | 568                            | 1.23       | 0.108275            |
| Super 85 B               | 0.33666             | 0.35704                      | 0.02038              | 0.33666             | 0.3579                       | 0.02124              | 0.00086                         | 1.2                   | 567.9                          | 1.03       | 0.090685            |
| Pasting A(HOPPER)        | 0.35176             | 0.37243                      | 0.02067              | 0.35176             | 0.373                        | 0.02126              | 0.00059                         | 1.2                   | 590.2                          | 0.7        | 0.059302            |
| Pasting B (PASTE MIXING) | 0.35182             | 0.37241                      | 0.02059              | 0.35182             | 0.373                        | 0.02113              | 0.00054                         | 1.2                   | 600.2                          | 0.64       | 0.053316            |
| Pasting A(STACKING)      | 0.33673             | 0.35728                      | 0.02055              | 0.33673             | 0.3579                       | 0.02112              | 0.00057                         | 1.2                   | 601.8                          | 0.0055     | 0.000457            |

**Table S2.** The result of measurements of Lead (Pb) concentration in factory wastewater within the Associated Battery Manufacturing (East Africa).

| Sample number | Before treatment in (ppm) |        |         | After treatment (ppm) |        |         |
|---------------|---------------------------|--------|---------|-----------------------|--------|---------|
|               | Run 1                     | Run 2  | Average | Run 1                 | Run 2  | Average |
| 1             | 0.3255                    | 0.3265 | 0.326   | 0.2874                | 0.289  | 0.2882  |
| 2             | 0.3125                    | 0.3145 | 0.3155  | 0.283                 | 0.2912 | 0.2871  |
| 3             | 0.3277                    | 0.3277 | 0.3237  | 0.28                  | 0.296  | 0.288   |
| 4             | 0.3187                    | 0.3227 | 0.3207  | 0.29                  | 0.2932 | 0.2916  |
| 5             | 0.3235                    | 0.318  | 0.3185  | 0.289                 | 0.2922 | 0.2906  |

**Table S3.** The measurements of Lead (Pb) concentration in the plant extract in ppm within the Associated Battery Manufacturing (East Africa ).

| Sample number | Sampling point         | Run 1 (ppm) | Run 2 (ppm) | Average (ppm) |
|---------------|------------------------|-------------|-------------|---------------|
| 1             | Area around local WWTP | 1.2387      | 1.2389      | 1.2388        |
| 2             | Distribution section   | 1.1835      | 1.1833      | 1.1834        |
| 3             | Area around Casting    | 1.1945      | 1.2051      | 1.1998        |
| 4             | Area around local WWTP | 1.2231      | 1.2273      | 1.2252        |
| 5             | Area around local WWTP | 1.222       | 1.2254      | 1.2227        |
